# Supplementary material for: Temperature imaging of water in a microchannel using thermal sensitivity of near-infrared absorption
Source: Royal Society of Chemistry journal article supplement (doi:10.1039/c1lc20261h), 2011-01-01
Supplement: c1lc20261h.pdf [file c1lc20261h.pdf]

Supplementary Figure for:

Temperature imaging of water in a microchannel using thermal sensitivity of near-infrared absorption

Naoto Kakuta, Yuko Fukuhara, Katsuya Kondo, Hidenobu Arimoto and Yukio Yamada

Fig. 6 in a black and white print friendly version

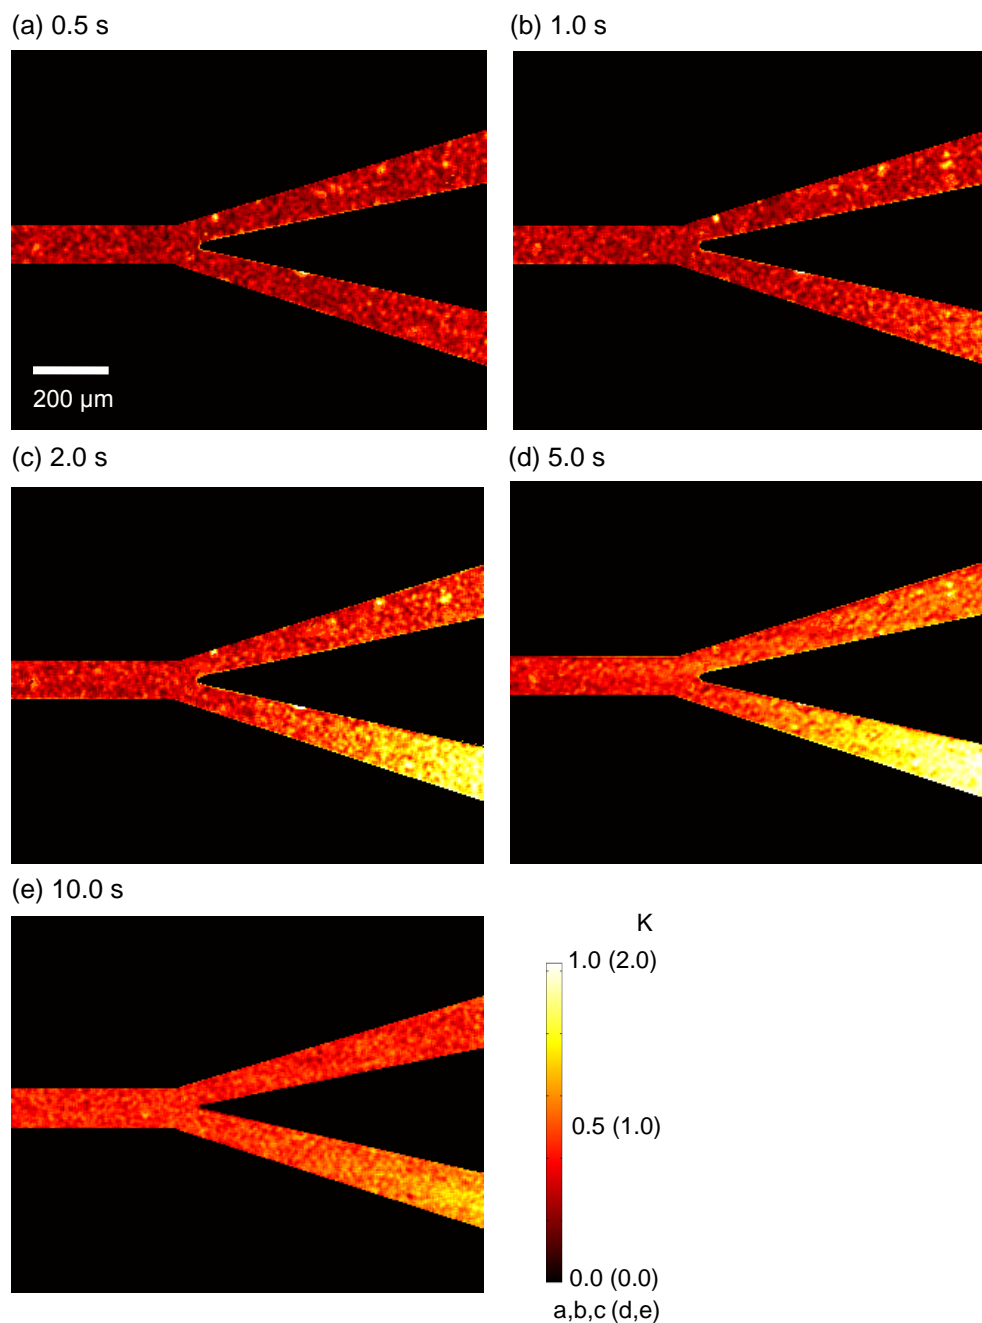

**Fig. 6** Images of the temperature difference,  $\Delta T$ , at (a) 0.5 s, (b) 1.0 s, (c) 2.0 s, (d) 5.0 s, and (e) 10.0 s after the start of 5 s wire heating, where the image at 0 s is the reference. Note that the color-bar indicates two different scales; 0–1 K is for (a), (b), and (c) and 0–2 K (in parentheses) is for (d) and (e).
